1 **Working title:**

2 **Detection of H3N8 influenza A virus with multiple mammalian-**  
3 **adaptive mutations in a rescued Grey seal (*Halichoerus grypus*) pup**

4  
5 Divya Venkatesh<sup>1</sup>, Carlo Bianco<sup>2, 3</sup>, Alejandro Núñez<sup>2</sup>, Rachael Collins<sup>4</sup>, Darryl Thorpe<sup>5</sup>, Scott M.  
6 Reid<sup>6</sup>, Sharon M. Brookes<sup>6</sup>, Steve Essen<sup>6, 7</sup>, Natalie McGinn<sup>6, 7</sup>, James Seekings<sup>6, 7</sup>, Jayne  
7 Cooper<sup>6</sup>, Ian H. Brown<sup>6, 7</sup>, Nicola S. Lewis<sup>1, 7</sup>

8 1. Department of Pathobiology and Population Sciences, Royal Veterinary College, Hatfield,  
9 Hertfordshire, United Kingdom

10 2. Pathology Department, Animal and Plant Health Agency (APHA-Weybridge), Woodham  
11 Lane, New Haw, Addlestone, KT15 3NB, United Kingdom

12 3. Diagnostic & Consultant Avian Pathology, Pathology Department, Animal and Plant  
13 Health Agency (APHA- Lasswade) Pentlands Science Park, Bush Loan, Penicuik,  
14 Midlothian, EH26 0PZ, United Kingdom.

15 4. Animal and Plant Health Agency, Starcross Veterinary Investigation Centre, Staplake  
16 Mount, Starcross, Devon, EX6 8PE, United Kingdom

17 5. British Divers Marine Life Rescue, Lime House, Regency Close, Uckfield, East Sussex,  
18 TN22 1DS, United Kingdom

19 6. Virology Department, Animal and Plant Health Agency (APHA-Weybridge), Woodham  
20 Lane, New Haw, Addlestone, KT15 3NB, United Kingdom

21 7. OIE/FAO/EURL International Reference Laboratory for avian influenza, swine influenza  
22 and Newcastle Disease, Animal and Plant Health Agency (APHA) - Weybridge,  
23 Addlestone, Surrey, United Kingdom

24

25

26

27

28 ABSTRACT

29 Avian Influenza A Viruses (IAV) in different species of seals display a spectrum of pathogenicity, from  
30 subclinical infection to mass mortality events. Here we present an investigation of avian IAV infection  
31 in a 3-4 month old Grey seal (*Halichoerus grypus*) pup, rescued from St Michael's Mount, Cornwall in  
32 2017. The pup underwent medical treatment but died after two weeks; post-mortem examination  
33 and histology indicated sepsis as the cause of death. IAV NP antigen was detected by  
34 immunohistochemistry in the nasal mucosa, and sensitive real-time reverse transcription polymerase  
35 chain reaction assays detected trace amounts of viral RNA within the lower respiratory tract,  
36 suggesting that the infection may have been cleared naturally. IAV prevalence among Grey seals  
37 may therefore be underestimated. Moreover, contact with humans during the rescue raised concerns  
38 about potential zoonotic risk. Nucleotide sequencing revealed the virus to be of subtype H3N8.  
39 Combining a GISAID database BLAST search and time-scaled phylogenetic analyses, we inferred  
40 that the seal virus originated from an unsampled, locally circulating (in Northern Europe) viruses,  
41 likely from wild Anseriformes. From examining the protein alignments, we found several residue  
42 changes in the seal virus that did not occur in the bird viruses, including D701N in the PB2 segment,  
43 a rare mutation, and a hallmark of mammalian adaptation of bird viruses. IAVs of H3N8 subtype have  
44 been noted for their particular ability to cross the species barrier and cause productive infections,  
45 including historical records suggesting that they may have caused the 1889 pandemic. Therefore,  
46 infections such as the one we report here may be of interest to pandemic surveillance and risk and  
47 may help us better understand the determinants and drivers of mammalian adaptation in influenza.

48

49

50

51

(Word count: 277)

## 52 INTRODUCTION

53 Influenza A viruses (IAVs) are important pathogens for humans and livestock including pigs and  
54 poultry. They are segmented RNA viruses, whose genomes consist of eight segments of RNA, which  
55 code for ~11 proteins/polypeptides. IAVs are classified into several subtypes based on the antigenic  
56 properties of two surface glycoproteins haemagglutinin (HA, avian subtypes H1-H16) and  
57 neuraminidase (NA, avian subtypes N1-N9). Viruses of most subtypes can be found in wild waterfowl  
58 and shorebirds which are their natural reservoir (Alexander, 2007; Easterday et al., 1968) and can  
59 infect both domestic birds and mammalian species in spill-over infections. A few IAV lineages have  
60 become established in mammals such as humans, pigs, horses, and dogs though only of subtypes  
61 H1, H2 and H3 in combination with N1, N2 or N8 (Reperant et al., 2009; Webster et al., 1992).

62  
63 IAV in birds replicates mainly in the intestine and is transmitted through the faecal-oral route,  
64 although respiratory tropism and oropharyngeal shedding has been noted (Webster et al., 1978;  
65 Daoust et al., 2011; Höfle et al., 2012; França et al., 2012; Daoust et al., 2013), and the virus can  
66 survive in the environment for fairly long periods (Brown et al., 2009; Stallknecht et al., 1990). This  
67 creates conditions conducive to viral exchange with marine mammals such as pinnipeds (seals),  
68 whose habitats and prey intersect with those of waterfowl and shorebirds. Several cases of marine  
69 mammal infection with IAV of many subtypes including H1N1, H3N3, H3N8, H4N5, H4N6, H7N7 and  
70 H10N7 have been documented with a spectrum of effects ranging from mass die-offs to  
71 asymptomatic; in a majority of these cases, the source is implicated to be avian (Fereidouni et al.,  
72 2016; White, 2013). A few studies have also suggested that Grey seals may act as an endemically  
73 infected reservoir which may disseminate viruses in coastal ecosystems to other mammals, coastal  
74 birds, and potentially humans (Duignan et al., 1995, 1997; Puryear et al., 2016). Indeed,  
75 seroprevalence levels in live-captured healthy Grey seal populations (20 – 26%) (Bodewes et al.,  
76 2015; Puryear et al., 2016) is comparable with levels found in wild birds (31% - 60%) depending on  
77 species, geography, seasonality and other factors (Curran et al., 2015; Fereidouni et al., 2010; Wilson  
78 et al., 2013).

79

80 In seals, IAV binds the same type of sialyloligosaccharide receptors as birds (SA $\alpha$ 2,3Gal), but the  
81 receptors are located in the respiratory tract and lungs instead of the intestinal tract, suggesting that  
82 inhalation is the most likely route of transmission (Ito et al., 1999; Ramis et al., 2012; White, 2013).  
83 Seals may also be infected by IAV from non-avian sources; there is serological evidence for infection  
84 of Baikal and ringed seals in Russia with human H3N2 strains A/Aichi/2/68 and A/Bangkok/1/79  
85 (Ohishi et al., 2004) and a human pandemic-2009 H1N1 virus was isolated from Elephant seals in  
86 2010 on the coast of California, USA. Furthermore, it has been shown that IAV from seals can  
87 replicate in human tissue and that seal IAV can be systemically virulent in primates (Murphy et al.,  
88 1983; Webster et al., 1981; White, 2013). Seals may therefore be potential sources of pandemic  
89 influenza.

90

91 In this paper, we report an H3N8 IAV infection of a rescued Grey seal pup in coastal England. We  
92 provide molecular and histological evidence for presence of IAV in the seal's respiratory tissues, and  
93 conclude from the post-mortem that the clinical presentation was not caused by IAV. To our  
94 knowledge, we provide the first whole genome sequence for an IAV isolated from a Grey seal, as  
95 attempts so far have been unsuccessful. We use phylogenetic analyses to find the putative sources  
96 of this virus and look for adaptive changes in its sequence. We compare this case with previously  
97 described seal infections to identify unique or parallel elements which may have implications for  
98 animal and human health.

99

## 100 METHODS

### 101 *Clinical history and medical interventions*

102 In February 2017, a female Grey seal (*Halichoerus grypus*) pup was rescued from St Michael's  
103 Mount, Cornwall. Physical examination of the animal on admittance to the rehabilitation centre  
104 revealed an emaciated and dehydrated subject (body weight = 20 kg). The estimated age was 3 to 4  
105 months. The animal exhibited a mucoid nasal discharge and a 1 cm wound on the ventral thorax. Its  
106 temperature was 39.9 °C and breathing rate was abnormal (continuous breathing pattern, 12 breaths  
107 per minute). The pup was monitored and provided nutritional support, fluid therapy and antibiotic

108 treatment, but died suddenly 14 days after admittance. The carcass and a nasal swab were  
109 submitted to the Animal and Plant Health Agency (APHA) for virological investigation.

110

### 111 *Pathology, histopathology and immunohistochemistry*

112 The carcass underwent a full post-mortem examination. A set of tissues was sampled and fixed in  
113 buffered formalin (nasal turbinates, trachea, lung, kidney, soft tissues adjacent to the  
114 cutaneous/subcutaneous lesion, and lymph node). A standard histopathological examination was  
115 carried out on the tissues (Hematoxylin & eosin), followed by an immunohistochemical investigation  
116 targeting nucleoprotein to detect intra-lesional IAV along the respiratory tract (Brookes et al., 2010).

117

### 118 *Real-time reverse transcription polymerase chain reaction (RRT-PCR)*

119 RNA was extracted from the nasal swab and tissue suspensions using the QIAmp viral RNA  
120 BioRobot kit customised for APHA in conjunction with a Universal BioRobot (Qiagen, Manchester,  
121 UK) (Slomka et al., 2009). RRT-PCR testing of the RNA extracts comprised (i) the Matrix (M)-gene  
122 assay for generic IAV detection using the primers and probes of (Nagy et al., 2010) and (ii) H5 and H7  
123 IAV RRT-PCR assays to test for notifiable avian influenza (Slomka et al., 2007, 2009). For each RRT-  
124 PCR assay, samples producing a threshold cycle (CT) value <36.0 were considered positive (Slomka  
125 et al., 2010). The RNA was also tested by an IAV N1-specific RRT-PCR according to the procedure  
126 described by (Payungporn et al., 2006), an IAV N5-specific RRT-PCR (James et al. 2018) and two  
127 IAV subtype N8-specific RRT-PCRs (James et al., 2018) with the same positive/negative acceptance  
128 criteria. All amplifications were carried out in an MX3000P qPCR System (Agilent).

129

### 130 *Virus isolation and whole genome sequencing*

131 Attempted virus isolation in 9- to 11-day old SPF embryonated fowls' eggs was performed on the  
132 nasal swab sample according to the internationally-recognised European Union (EU) and OIE  
133 methods (EU, 2006; OIE, 2015), but was unsuccessful. RNA was sequenced using the MiSeq  
134 platform. Briefly, viral RNA was extracted from the egg-isolate of the virus from the nasal swab using  
135 the QIAmp viral RNA mini-kit without the addition of carrier RNA (Qiagen, Manchester, UK). cDNA  
136 was synthesized from RNA using a random hexamer primer mix and cDNA Synthesis System

137 (Roche, UK). The Sequence library was prepared using a NexteraXT kit (Illumina, Cambridge, UK).  
138 Quality control and quantification of the cDNA and Sequence Library was performed using  
139 Quantifluor dsDNA System (Promega, UK). Sequence libraries were run on a Miseq using MiSeq V2  
140 300 cycle kit (Illumina, Cambridge, UK) with 2x150 base paired-end reads. The raw sequence reads  
141 were analysed using publicly available bioinformatics software, following an in house pipeline,  
142 available on github (<https://github.com/ellisrichardj/FluSeqID/blob/master/FluSeqID.sh>). This pipeline  
143 de-novo assembles the raw data using the Velvet assembler (Zerbino and Birney, 2008), blasts the  
144 resulting contigs against a local database of influenza genes using Blast+ (Camacho et al., 2009),  
145 then maps the raw data against the highest scoring blast hit using the Burrows-Wheeler Aligner (Li,  
146 2013). The consensus sequence was extracted from the resultant bam file using a modified  
147 SAMtools software package (Li et al., 2009), script (vcf2consensus.pl) available at:  
148 [https://github.com/ellisrichardj/csu\\_scripts/blob/master/vcf2consensus.pl](https://github.com/ellisrichardj/csu_scripts/blob/master/vcf2consensus.pl).

149

#### 150 *Phylogenetic analysis of the seal virus*

151 BLAST (Basic Local Alignment Search Tool) was used on GISAID (Elbe and Buckland-Merrett, 2017;  
152 Shu and McCauley, 2017) to find the top 50 closest related viral segments for each segment of the  
153 seal virus. We combined the seal virus sequence (query) along with the BLAST-hits sequences  
154 (blasthit) for each segment for phylogenetic analysis. We removed sequences containing duplicate  
155 strain names and aligned with MAFFT (Katoh and Standley, 2013) using automatic settings.  
156 Alignments for each segment were inspected manually on AliView (Larsson, 2014) and the ends  
157 trimmed to the starting ATG and end STOP codon. Exploratory trees were run using FastTree (Price  
158 et al., 2009), after which we used IQ-TREE (Nguyen et al., 2015) to make the final maximum-  
159 likelihood tree with 1000 iterations of alrt (approximate likelihood ratio test) for branch support.  
160 Tempest v1.5 (Rambaut et al., 2016) was used to test ML trees for clock-like behaviour. Trees for all  
161 segments except MP showed clock-like behaviour (**Figure S1**), so results from the MP dataset were  
162 excluded. BEAST v1.10.1 (Bayesian Evolutionary Analysis Sampling Trees) (Suchard et al., 2018) was  
163 used to determine the putative time and source of emergence of the different segments of the seal  
164 virus. BEAST performs Bayesian analysis of molecular sequences using MCMC (Markov Chain  
165 Monte Carlo) methods. For all segments other than MP and NS which have multiple reading frames,

166 we used the SRD06 site model which partitions the codons into 1+2 and 3. For NS we used a GTR  
167 model with no codon partitioning. The rest of the priors were kept identical for all segments: an  
168 uncorrelated relaxed lognormal clock, GMRF (Gaussian Markov random field) Bayesian skyride tree  
169 (Minin et al., 2008), 7 million MCMC generations with sampling every 7000. Two separate runs were  
170 performed for each segment, which were combined after logs were inspected in Tracer  
171 v1.7.1 (Rambaut et al., 2018) for appropriate mixing and ESS (effective sample size) values > 200.  
172 Trees were summarised into median clade credibility trees (MCC) and plotted in R v3.5 (using the  
173 ggtree package (Yu et al., 2017).

174

### 175 *Amino acid substitutions*

176 Trimmed alignments of each segment were manually inspected in AliView software (Larsson, 2014),  
177 translated into amino-acids, and checked for amino acid changes across each dataset. We identified  
178 several substitutions in the seal virus that did not occur in any of the bird virus sequences. We  
179 recorded these substitutions, and used the H3-numbering of the sequence using the HA subtype  
180 numbering conversion tool available from FluDB ((Burke and Smith, 2014),  
181 <https://tinyurl.com/HAnumbering>) for the HA protein. We also looked for differences in glycosylation  
182 patterns between the seal and the related wild bird HA and NA glycoproteins using a program to  
183 detect Asn-X-Ser or Asn-X-Thr (where X is any amino acid other than Proline) patterns in the amino  
184 acid sequences (personal communication from Todd Davis, CDC, USA)

185

## 186 RESULTS

### 187 *Pathology and immunohistochemistry*

188 The post-mortem revealed abundant purulent fluid (approximately 1 litre) in the subcutaneous  
189 tissues of the right side of the body extending from the neck to the thoracic region (**Figure 1A**). All  
190 other organs were macroscopically unremarkable. The blubber sternal thickness was 0.4 cm.  
191 Histology identified a severe, chronic-active, fibrino-purulent cellulitis and fasciitis and a severe,  
192 acute renal infarct with thrombosis. In the respiratory system a diffuse mild to moderate rhinitis with  
193 epithelial hyperplasia and presence of mites was observed in the nasal cavity and a focal broncho-  
194 interstitial pneumonia with thrombosis and pulmonary nematodes were seen in the lungs, with no

195 changes observed in trachea and bronchi. Influenza A virus antigen was detected by  
196 immunohistochemistry only in the nasal mucosa, in the nuclei of scattered isolated epithelial cells  
197 **(Figure 1B)**. The pathological findings were suggestive of a thromboembolic event and sepsis  
198 caused by the cellulitis as the cause of the death of the animal.

199

#### 200 *Detection and subtyping of IAV by RRT-PCR*

201 The nasal swab was positive for the M-gene (CT value of 22.36), signifying the presence of IAV RNA  
202 but was negative for NA1 haemagglutinin (HA) subtypes H5 and H7 as well as the IAV subtypes N1  
203 and N5. However, IAV subtype N8 was detected by one of the specific RRT-PCR assays employed  
204 (CT value of 24.38). In addition, trace amounts of IAV RNA were detected by the M-gene RRT-PCR  
205 assay in tracheal bronchi (CT value of 35.88), the left lung (CT value of 37.73) and the right cranial  
206 lung (CT value of 38.67). Due to low levels of virus detected in the lower respiratory tract, and the  
207 presence of clinical signs not consistent with influenza infection, we concluded that the virus was of  
208 no or low pathogenicity. It is possible that at the point the seal was rescued, it had already cleared  
209 the infection in the lungs naturally, which would explain trace amounts of detection in these tissues.  
210 This is consistent with previous studies which found that Grey seals were likely to remain  
211 asymptomatic with IAV infection while a proportion of the surveyed adults and juveniles were  
212 seropositive (Bodewes et al., 2015; Puryear et al., 2016).

213

214 Sequencing results from the nasal swab egg-isolate indicated no mixed infection, just a single virus,  
215 from which it was possible to sequence all eight gene segments. The virus-derived sequence was  
216 named A/Grey seal/England/027661/2017 and sequences were deposited in GISAID database  
217 (Global Initiative on Sharing All Influenza Data) with isolate ID: EPI\_ISL\_381748.

218

#### 219 *Source of viral segments*

220 Segment gene sequences which were found to be most closely related to the genes of the seal virus  
221 by BLAST were of avian origin. Overall, the strains in the set of BLAST-hits for each segment gene,  
222 all came from different avian viruses, isolated from different bird-types, and of different subtypes.  
223 They were from strains that were mostly isolated from wild birds such as mallard, Eurasian teal,



224 White-fronted goose, Black-headed gull (*Anas platyrhynchos*, *Anas crecca*, *Anser albifrons*,  
225 *Chroicocephalus ridibundus*) and others, along with a few from domestic birds such as chickens  
226 (*Gallus gallus domesticus*). This indicates a wild bird origin for the seal virus, which is consistent with  
227 previously detected seal infections (Fereidouni et al., 2016; White, 2013), and the hypothesis that  
228 overlapping habitats for wild birds and seals make transmission from wild birds possible, but less  
229 likely from poultry, pigs or humans.

230

231 Also similar to previously reported infections (Anthony et al., 2012; Zohari et al., 2014), the set of  
232 closest related strains were isolated from within the local region, in this case, Northern Europe (The  
233 Netherlands, Germany, UK etc.) with the exception of three strains from China being among the  
234 close relatives of the PB1 sequence. The years of detection of the closest-related avian viruses for  
235 each segment ranged from the 2007 (NA) to 2017 (NS).

236

237 **Table S1** shows a summary for how often the same strain appears as a BLAST-hit for each segment  
238 of the seal virus. A large proportion of these occur singly (250 strains) or for a maximum of two  
239 segments (40 strains). However, some strains were found to map for 3, 4 or 5 segments (19, 2 and 1  
240 strains(s) respectively). Of these, all the strains that mapped for at least 3 segments were isolated  
241 from birds in the Netherlands between 2011-15, except for one chicken virus from France in 2016.  
242 The subtypes varied greatly, but they were usually isolated from wild birds. In the next section, we  
243 further examine the closest available sequence(s) for each seal gene segment to try and understand  
244 the emergence and further propagation of this virus.

245

#### 246 *Emergence of viral segments*

247 There is no dedicated surveillance program for seals in England so infection status in seals as  
248 endemic or one-off spill over event is uncertain. Previous studies in the US have indicated that Grey  
249 seals are possibly a reservoir for IAV and other viruses (Duignan et al., 1995, 1997; Puryear et al.,  
250 2016), We performed a time-scaled analysis with the set of closely related avian virus segment  
251 sequences, to test if all segments from seal virus had a similar point of introduction, i.e., similar time  
252 to most recent common ancestor (TMRCA) of the seal and wild bird viruses for all segments, or the

253 extent to which this varied segment to segment. We used BEAST to reconstruct time-scaled  
254 phylogenies for each of our segment datasets.

255

256 Maximum clade credibility trees for each segment are presented in **Figure 2 (A-G)**; a maximum-  
257 likelihood tree is presented for the MP gene segment in **Figure 2H** as it was excluded from BEAST  
258 analysis due to lack of clock-like behaviour in the dataset. Time to the putative ancestor strain of the  
259 segments from the seal virus and its closest related segment is inferred as ranging from 1999 (NA) to  
260 between 2011 and 2015 (all other gene segments), summarised in **Figure 3** and **Table 1**. Gaps in  
261 surveillance, and the availability of just one seal strain will likely affect the inference of TMRCAs, but  
262 the variation between segments is also likely a testament to the high levels of reassortment seen in  
263 wild bird IAVs (Lu et al., 2014). Indeed, the closest associated virus varies in host, subtype and  
264 geography of isolation for each segment, as can be seen in the highlighted clades in **Figure 2 (A-H)**,  
265 and summarised in **Table 1**. Consistent with data of BLAST hits (Table S1), many of the closest  
266 related segments are from strains isolated in the Netherlands (HA, MP, NP, NS, PA, PB1, PB2).  
267 Where multiple strains are equally closely related to the seal virus, e.g. for PB1 and PB2, the avian  
268 influenza strains come from the Netherlands and France. The closest strain to the seal NA gene that  
269 has been sampled is from 2009 at the latest, from Norway. For the NS gene, the closest segments  
270 appear to be from Russian strains in chickens as recent as December 2017, which may indicate  
271 onward transmission via unsampled intermediaries; however the posterior probability support value  
272 for the node is low (0.36).

273

274 From the above observations, we conclude that most of the Grey seal virus segments are derived  
275 from viruses in wild birds in Northern Europe, possibly via unsampled intermediaries – but not in a  
276 single transmission event. In contrast, the 2011 H3N8 Harbour seal virus appears to have been  
277 derived from a single source. The closest related strain for all internal gene segments as identified by  
278 BLAST and maximum-likelihood trees is the *A/American\_black\_duck/New\_Brunswick/03552/2009*  
279 (an H4N6 isolated on 2009-09-11). The closest related strains for the glycoproteins are different but  
280 this likely indicates a bias for sequencing glycoproteins over the internal genes. They are both H3N8  
281 viruses from the same area (North-eastern US) isolated closer in time to the Harbour seal virus:

282 A/blue-winged\_teal/New\_Brunswick/00291/2010 isolated 2010-09-14 (for HA) and  
283 A/northern\_pintail/Minnesota/AI09-4322/2009 isolated 2009-09-12 (for NA). See **Table S2A** and **B**  
284 for comparison.

285

### 286 *Substitutions for mammalian adaptation*

287 Previous analyses have indicated that mammalian adaptive mutations can occur in avian viruses  
288 when they are transmitted into seals. A study of H10N7 viruses in Harbour seals in Northern Europe,  
289 which unlike the present case was demonstrated to have transmitted to other seals and caused an  
290 outbreak, showed that mutations were likely to occur early on after transmission to seals and then  
291 plateau (Bodewes et al., 2016). We looked for differences between the seal virus and wild bird  
292 viruses in the segment amino acid alignments of our datasets, to check if they any had putative  
293 adaptive implications.

294

295 We found several amino acid substitutions in the seal virus that did not occur in any of the related  
296 bird viruses. These substitutions are summarised in **Table 2**, along with references for those that  
297 have been identified in previous studies of mammalian adaptation. Many of these changes occur in  
298 the polymerase complex genes (Mänz et al., 2013): D701N in the PB2 segment is a rare mutation,  
299 and a hallmark of mammalian adaptation of bird viruses, regardless of genetic background (Liu et al.,  
300 2018; Steel et al., 2009)). Liu and Steel et. al. have elucidated that the basis of this adaptation is that  
301 it allows for better replication in mammalian cells and showed that it has been associated with  
302 increased transmission in ferret experiments. Another mutation in the PB2 gene, at residue 105 in its  
303 NP-binding region (Poole et al., 2004) was also found in studies that used phylogenetic modelling  
304 (Tamuri et al., 2009) and mutual information statistics (Miotto et al., 2008, 2010). Both the mutations  
305 found in the PB1 gene are also of interest. PB1-I517V was found by Tamuri et al. and S678N found  
306 in the seal PB1 gene has been associated with increased polymerase activity and virulence in mice  
307 (Gabriel et al., 2005).

308

309 Changes were also found in the HA gene (**Table 2**), but the implications are less clear. There appear  
310 to be no changes in the glycosylation patterns between the HA and NA of the Grey seal virus in  
311 comparison to related wild bird viruses (**Table S3A and B**).

312

313 We compared all the substitutions with previously described mutations in seal infections, and found  
314 that apart from D701N, which was also found in the H3N8 seal virus infection in Massachusetts in  
315 2011 (Anthony et al., 2012), there were no convergent amino acid changes. In the H3 HA gene, we  
316 found substitutions in residue 81 (reference H3 numbering - 64), and residue 176 (reference H3  
317 numbering - 160), and these are also changed in the 2011 Massachusetts virus (Anthony et al., 2012)  
318 but to different amino acids. The latter mutation was not implicated in receptor binding for the seal  
319 viruses as was the case with H5N1 and some human H3N2 viruses, because the glycosylation site is  
320 absent in both seal and wild bird viruses (**Table S3A**). The HA of the 2011 Massachusetts virus had  
321 an F110S mutation, where the 110 residue has been previously found to be a critical component of  
322 the influenza fusion peptide, which may impact replication in mammalian cells (Anthony et al., 2012;  
323 Liu et al., 2011). Our reported seal virus retains F at position 110, but whether the mutation in the  
324 adjoining residue at S111G (reference H3 numbering 95) has any effect on HA fusion properties is  
325 unknown. The presence of Serine at position 66 in the PB1 sequence, which enables production of  
326 PB1-F2 (Conenello et al., 2007) was found in the 2011 H3N8 Harbour seal virus but was not seen in  
327 this 2017 H3N8 Grey seal virus. Changes at positions 226 and 228 in HA (reference H3 numbering)  
328 which can change receptor-binding preferences between avian and mammalian hosts (Connor et al.,  
329 1994; Matrosovich et al., 2000), were not found in either of the H3N8 seal viruses, but the H10  
330 equivalent of H3-Q226L was identified in viruses from the 2014-15 H10N7 outbreak in Europe  
331 (Dittrich et al., 2018).

332

## 333 DISCUSSION

334 In the seal infection case reported here, the animal was referred to a rescue centre because it was  
335 stranded and the IAV was detected only incidentally. The vast majority of Grey seals admitted to  
336 rehabilitation centres in the UK are pups within the first year of life. Malnutrition is the single most  
337 common reason for pinnipeds to be taken into rehabilitation centres (Barnett et al., 2000; Van Bonn,

338 2015). Wounds are often recorded and hold clinical significance, as in this case, and have been  
339 considered predisposing factors for fatal non-specific septicaemia (Baily, 2014). The cause of trauma  
340 and wounds may be anthropic (entanglement in fishing nets or gears) or biologic (conspecific  
341 aggressiveness or hierarchical to cannibalistic behaviours). Wounds caused by bites of other seals or  
342 predators were most often seen (Barnett et al., 2000; Van Bonn, 2015). Pulmonary and nasal  
343 parasites are also very well documented clinico-pathological conditions among rescued seal pups,  
344 and likely caused the hyperplastic rhinitis identified in this study seal. No histopathological findings  
345 consistent with IAV derived damage were detected along the respiratory tract. The  
346 immunohistochemistry demonstrated productive viral replication only in nasal mucosa, but not in  
347 lower respiratory segments, although the more sensitive RRT-PCR revealed presence of trace  
348 amounts of viral RNA within the lower respiratory tract, suggesting that the infection may have been  
349 cleared naturally or indicating a passive translocation of antigen from upper respiratory segments.  
350 Efficient clearance in healthy Grey seals may explain why previous attempts at sequencing IAV from  
351 identified during surveillance were unsuccessful (Puryear et al., 2016).

352

353 Puryear et al. discuss the possibility that Grey seals may be more prone to infection due to gain in  
354 population density since the marine mammal protection act in the US in 1972, along with more  
355 socially gregarious and aggressive behaviour in comparison to Harbour seals, all of which contribute  
356 to high pathogen transmissibility. Why we see differences between Grey and Harbour seals in their  
357 resistance to diseases caused by viral agents is however unclear. Phylogenetic analyses have been  
358 unable to resolve the relationships between different seal species with sufficient support but Grey  
359 seals are either placed as a sister group to Caspian seals (*Pusa Caspica*) and separate from Harbour  
360 seals, or in a basal position to both *Phoca* and *Pusa* genus (Berta et al., 2018; Fulton and Strobeck,  
361 2006). It might be useful to explore long-term evolutionary history of host-pathogen relationships  
362 along with host physiology and immune response differences between different seal species to  
363 understand differences in viral pathogenicity.

364

365 In our dataset of closest related sequences to the seal virus, we find that while there are several  
366 substitutions found in the seal virus which do not occur in the bird viruses; we generally do not find

367 substitutions in any of the bird virus strains that do not occur in other bird viruses too. This likely  
368 indicates adaptation to the seal environment, a hypothesis supported by the occurrence of the  
369 D701N mutation, a known rare marker of mammalian adaptation (Liu et al., 2018; Steel et al., 2009).  
370 D701N is common in canine and horse H3N8 IAV (see **Table S4**), but does not occur in birds, and  
371 was found associated with highly-pathogenic H5N1 viruses which infected humans (Gabriel et al.,  
372 2005; Jong et al., 2006; Li et al., 2005). We found one reported instance of the D701N mutation in  
373 the other avian H3N8 virus that infected pinnipeds, but not in the H10N7 outbreak, despite sustained  
374 transmission in seals for several months, nor in any other previously sequenced seal PB2. H3N8 IAV  
375 are noted for the ability cross species barriers, so it would be relevant to consider if the subtype of  
376 the virus has any influence on the kind of adaptive mutations that occur in the polymerase genes,  
377 and if so what sort of mechanisms this might involve. We also note that many of the putative  
378 adaptive substitutions occur in the polymerase complex genes, which are increasingly being  
379 recognised for their vital role in mediating viral host range (in addition to receptor compatibility with  
380 glycoproteins).

381

382 The occurrence of adaptive substitutions in the viral sequence could mean that it has been  
383 circulating in seals for a certain amount of time during which these substitutions have accumulated.  
384 Alternatively, this event might represent an early rapidly-adapting virus from a spill-over event as  
385 seen in the H10N7 outbreak (Bodewes et al., 2016). Given the subclinical nature of the infection, we  
386 propose the former explanation is more likely to be correct. However, since the case of the seal virus  
387 in this study appears to be a singular infection as far as we know, it is difficult to know if and how  
388 long the virus has been in seals. Both this study and Bodewes et al. report that despite mammalian  
389 adaptation of the virus, continued contact with bird reservoirs allows for further exchange of viral  
390 segments between the two hosts. It should be noted that the segment for which this study has  
391 tentative evidence of onward transmission (NS) does not appear to have acquired any putative  
392 mammalian-adaptive mutations. The nature of the Grey seal reservoir, if it exists, and its relationship  
393 with the avian reservoir is currently unknown.

394

395 The 2011 North American H3N8 and 2014 European H10N7 viruses which caused outbreaks in  
396 Harbour seals were found to have acquired mutations to enable recognition of sialyloligosaccharide  
397 receptors found more abundantly in mammalian tissues (SA $\alpha$ 2,6Gal) but which retained the ability to  
398 interact with avian receptors (SA $\alpha$ 2,3Gal). A later detailed structural and functional analysis of the  
399 2011 H3N8 seal HA indicated a true avian receptor binding preference (Yang et al., 2015), as did a  
400 mutational analysis of the H10N7 viruses (Dittrich et al., 2018). Although there are some common  
401 HA residues that are changed in both the seal virus reported here and the 2011 H3N8 virus, we  
402 found limited convergence in the substitutions and residues involved between the different seal  
403 viruses, likely attributable to the different genetic backgrounds from different avian sources and  
404 possibly differences in host environment of reservoir vs susceptible species. In addition, to the best  
405 of our knowledge, ours is the first Grey seal virus sequence that is being made publicly available (via  
406 GISAID). It is therefore uncertain whether the type of mutations occurring in a putative reservoir host  
407 vis-à-vis avian sequence might be different from those occurring in related hosts with pathogenic  
408 outcomes.

409  
410 Our phylogeny and molecular clock analyses suggest different lineages of source viruses, and time  
411 of introduction of different segments (with the caveat of being inferred for a single sequence). It is not  
412 surprising to find that the closest sampled and sequenced viruses for each segment are of different  
413 subtypes, hosts and times of isolation, given the relatively low surveillance in wild birds, and the  
414 extensive reassortment (Lu et al., 2014) i.e., swapping of individual segments into different progeny  
415 viruses during propagation after mixed infection with two or more viruses. It would be speculative to  
416 propose likely wild bird species donor however. Studies on avian influenza have previously shown  
417 that the transmission between birds is directional, e.g., usually in the direction from anseriformes  
418 such as ducks into galliformes (chicken) or charadriiformes (gulls) (Venkatesh et al., 2018). In the  
419 case of the current infection as well, where we have found unambiguously closest related  
420 sequences, they have tended to have been isolated from anseriformes species. The above findings,  
421 along with the observation that the closest related viruses were isolated largely from the  
422 Netherlands, it is likely that the source of the viral segments come from unsampled locally circulating  
423 (in Northern Europe) avian viruses from an anseriformes host. The closest related wild bird viruses to

424 the 2011 H3N8 Harbour seal virus were also isolated from anseriformes species (American black  
425 duck). In contrast with the our Grey seal virus however, phylogenetic analysis reveals a highly  
426 overlapping set of wild bird strains that are most closely related with Harbour seal virus, an  
427 observation that suggests a single spill-over event into a susceptible host.

428

429 H3N8 viruses currently circulate in horses and dogs but not humans or pigs. However, different H3  
430 viruses have been found in several species including humans, pigs, horses, dogs, cats, seals,  
431 poultry, and wild aquatic birds. They have thus been noted for a particular ability to cross species  
432 barrier and cause productive infections. One study that examined the ability of H3N8 viruses from  
433 canine, equine, avian, and seal origin to productively infect pigs, demonstrated that avian and seal  
434 viruses replicated substantially and caused detectable lesions in inoculated pigs without prior  
435 adaptation (Solórzano et al., 2015). It is possible that the ready occurrence of PB2 701N mutation in  
436 H3N8 viruses contributes to this ability. We do not have any biological evidence for pre-20th century  
437 human influenza, but historical analysis suggests a long association of humans with influenza  
438 (Hirsch, 1883; Taubenberger and Morens, 2010), and has uncovered temporal–geographic  
439 associations between equine and human influenza-like disease activity documented in Europe in the  
440 16th-18th centuries (Morens and Taubenberger, 2010). Such analysis has also implicated an H3N8  
441 virus in the 1889 pandemic in humans (Morens and Taubenberger, 2010), which makes mammalian-  
442 adapted H3N8 viruses of particular interest as IAV pandemic risk candidates.

443

444 In this paper we have presented analyses of a case of seal infection with IAV in coastal England, and  
445 compared it with previously reported seal IAV infections. This infection provides a small but unique  
446 window to understand the ecology of avian-origin viruses that may be circulating and maintained in  
447 mammals. Given the mammalian adaptation activity in IAV upon transmission to seals, such  
448 infections may be of interest to pandemic surveillance and risk, and help us better understand the  
449 determinants of mammalian adaptation in influenza and its complex drivers.

450

451

452



453 REFERENCES

454

455 Alexander, D.J. (2007). An overview of the epidemiology of avian influenza. *Vaccine* 25, 5637–5644.

456 Anthony, S.J., Leger, J.A.S., Pugliares, K., Ip, H.S., Chan, J.M., Carpenter, Z.W., Navarrete-Macias,  
457 I., Sanchez-Leon, M., Saliki, J.T., Pedersen, J., et al. (2012). Emergence of Fatal Avian Influenza in  
458 New England Harbor Seals. *MBio* 3, e00166-12.

459 Baily, J.L. (2014). The pathology and occurrence of pathogens in Scottish grey seals (*Halichoerus*  
460 *grypus*). Thesis. University of St Andrews.

461 Barnett, J.E., Woodley, A.J., Hill, T.J., and Turner, L. (2000). Conditions in grey seal pups  
462 (*Halichoerus grypus*) presented for rehabilitation. *Vet. Rec.* 147, 98–104.

463 Berta, A., Churchill, M., and Boessenecker, R.W. (2018). The Origin and Evolutionary Biology of  
464 Pinnipeds: Seals, Sea Lions, and Walruses. *Annu. Rev. Earth Planet. Sci.* 46, 203–228.

465 Bodewes, R., García, A.R., Brasseur, S.M., Conteras, G.J.S., Bildt, M.W.G. van de, Koopmans,  
466 M.P.G., Osterhaus, A.D.M.E., and Kuiken, T. (2015). Seroprevalence of Antibodies against Seal  
467 Influenza A(H10N7) Virus in Harbor Seals and Gray Seals from the Netherlands. *PLOS ONE* 10,  
468 e0144899.

469 Bodewes, R., Zohari, S., Krog, J.S., Hall, M.D., Harder, T.C., Bestebroer, T.M., Bildt, M.W.G. van de,  
470 Spronken, M.I., Larsen, L.E., Siebert, U., et al. (2016). Spatiotemporal Analysis of the Genetic  
471 Diversity of Seal Influenza A(H10N7) Virus, Northwestern Europe. *J. Virol.* 90, 4269.

472 Brookes, S.M., Núñez, A., Choudhury, B., Matrosovich, M., Essen, S.C., Clifford, D., Slomka, M.J.,  
473 Kuntz-Simon, G., Garcon, F., Nash, B., et al. (2010). Replication, Pathogenesis and Transmission of  
474 Pandemic (H1N1) 2009 Virus in Non-Immune Pigs. *PLOS ONE* 5, e9068.

475 Brown, J.D., Goekjian, G., Poulson, R., Valeika, S., and Stallknecht, D.E. (2009). Avian influenza virus  
476 in water: Infectivity is dependent on pH, salinity and temperature. *Vet. Microbiol.* 136, 20–26.

477 Burke, D.F., and Smith, D.J. (2014). A Recommended Numbering Scheme for Influenza A HA  
478 Subtypes. *PLOS ONE* 9, e112302.

479 Camacho, C., Coulouris, G., Avagyan, V., Ma, N., Papadopoulos, J., Bealer, K., and Madden, T.L.  
480 (2009). BLAST+: architecture and applications. *BMC Bioinformatics* 10, 421.

481 Conenello, G.M., Zamarin, D., Perrone, L.A., Tumpey, T., and Palese, P. (2007). A Single Mutation in  
482 the PB1-F2 of H5N1 (HK/97) and 1918 Influenza A Viruses Contributes to Increased Virulence. *PLOS*  
483 *Pathog.* 3, e141.

484 Connor, R.J., Kawaoka, Y., Webster, R.G., and Paulson, J.C. (1994). Receptor Specificity in Human,  
485 Avian, and Equine H2 and H3 Influenza Virus Isolates. *Virology* 205, 17–23.

486 Curran, J.M., Ellis, T.M., and Robertson, I.D. (2015). Serological Surveillance of Wild Waterfowl in  
487 Northern Australia for Avian Influenza Virus Shows Variations in Prevalence and a Cyclical Periodicity  
488 of Infection. *Avian Dis.* 59, 492–497.

489 Daoust, P.-Y., Kibenge, F.S.B., Fouchier, R.A.M., van de Bildt, M.W.G., van Riel, D., and Kuiken, T.  
490 (2011). Replication of low pathogenic avian influenza virus in naturally infected mallard ducks (*Anas*  
491 *platyrhynchos*) causes no morphologic lesions. *J. Wildl. Dis.* 47, 401–409.

492 Daoust, P.Y., van de Bildt, M., van Riel, D., van Amerongen, G., Bestebroer, T., Vanderstichel, R.,  
493 Fouchier, R.A.M., and Kuiken, T. (2013). Replication of 2 Subtypes of Low-Pathogenicity Avian  
494 Influenza Virus of Duck and Gull Origins in Experimentally Infected Mallard Ducks. *Vet. Pathol.* 50,  
495 548–559.

- 496 Dittrich, A., Scheibner, D., Salaheldin, A.H., Veits, J., Gischke, M., Mettenleiter, T.C., and Abdelwhab,  
497 E.M. (2018). Impact of Mutations in the Hemagglutinin of H10N7 Viruses Isolated from Seals on Virus  
498 Replication in Avian and Human Cells. *Viruses* 10, 83.
- 499 Duignan, P.J., Saliki, J.T., St. Aubin, D.J., Early, G., Sadove, S., House, J.A., Kovacs, K., and Geraci,  
500 J.R. (1995). Epizootiology of morbillivirus infection in north american harbor seals (*phoca vitulina*) and  
501 gray seals (*halichoerus grypus*). *J. Wildl. Dis.* 31, 491–501.
- 502 Duignan, P.J., Duffy, N., Rima, B.K., and Geraci, J.R. (1997). Comparative antibody response in  
503 harbour and grey seals naturally infected by a morbillivirus. *Vet. Immunol. Immunopathol.* 55, 341–  
504 349.
- 505 Easterday, B.C., Trainer, D.O., Tůmová, B., and Pereira, H.G. (1968). Evidence of Infection with  
506 Influenza Viruses in Migratory Waterfowl. *Nature* 219, 523.
- 507 Elbe, S., and Buckland-Merrett, G. (2017). Data, disease and diplomacy: GISAID’s innovative  
508 contribution to global health. *Glob. Chall.* 1, 33–46.
- 509 EU (2006). Diagnostic Manual for avian influenza.
- 510 Fereidouni, S., Munoz, O., Von Dobschuetz, S., and De Nardi, M. (2016). Influenza Virus Infection of  
511 Marine Mammals. *EcoHealth* 13, 161–170.
- 512 Fereidouni, S.R., Werner, O., Starick, E., Beer, M., Harder, T.C., Aghakhan, M., Modirrousta, H.,  
513 Amini, H., Moghaddam, M.K., Bozorghmehrifard, M.H., et al. (2010). Avian influenza virus monitoring  
514 in wintering waterbirds in Iran, 2003-2007. *Viol. J.* 7, 43.
- 515 França, M., Stallknecht, D.E., Poulson, R., Brown, J., and Howerth, E.W. (2012). The Pathogenesis of  
516 Low Pathogenic Avian Influenza in Mallards. *Avian Dis.* 56, 976–980.
- 517 Fulton, T.L., and Strobeck, C. (2006). Molecular phylogeny of the Arctoidea (Carnivora): Effect of  
518 missing data on supertree and supermatrix analyses of multiple gene data sets. *Mol. Phylogenet.*  
519 *Evol.* 41, 165–181.
- 520 Gabriel, G., Dauber, B., Wolff, T., Planz, O., Klenk, H.-D., and Stech, J. (2005). The viral polymerase  
521 mediates adaptation of an avian influenza virus to a mammalian host. *Proc. Natl. Acad. Sci.* 102,  
522 18590–18595.
- 523 Hirsch, A. (1883). Handbook of geographical and historical pathology (New Sydenham Society).
- 524 Höfle, U., Bildt, M.W.G.V. de, Leijten, L.M., Amerongen, G.V., Verhagen, J.H., Fouchier, R.A.M.,  
525 Osterhaus, A.D.M.E., and Kuiken, T. (2012). Tissue tropism and pathology of natural influenza virus  
526 infection in black-headed gulls (*Chroicocephalus ridibundus*). *Avian Pathol.* 41, 547–553.
- 527 Ito, T., Kawaoka, Y., Nomura, A., and Otsuki, K. (1999). Receptor Specificity of Influenza A Viruses  
528 from Sea Mammals Correlates with Lung Sialyloligosaccharides in These Animals. *J. Vet. Med. Sci.*  
529 61, 955–958.
- 530 James, J., Slomka, M.J., Reid, S.M., Thomas, S.S., Mahmood, S., Byrne, A.M.P., Cooper, J.,  
531 Russell, C., Mollett, B.C., Agyeman-Dua, E., et al. (2018). Proceedings Paper—Avian Diseases 10th  
532 AI Symposium Issue Development and Application of Real-Time PCR Assays for Specific Detection  
533 of Contemporary Avian Influenza Virus Subtypes N5, N6, N7, N8, and N9. *Avian Dis.* 63, 209–218.
- 534 Jong, M.D. de, Simmons, C.P., Thanh, T.T., Hien, V.M., Smith, G.J.D., Chau, T.N.B., Hoang, D.M.,  
535 Chau, N.V.V., Khanh, T.H., Dong, V.C., et al. (2006). Fatal outcome of human influenza A (H5N1) is  
536 associated with high viral load and hypercytokinemia. *Nat. Med.* 12, 1203.

- 537 Katoh, K., and Standley, D.M. (2013). MAFFT Multiple Sequence Alignment Software Version 7:  
538 Improvements in Performance and Usability. *Mol. Biol. Evol.* 30, 772–780.
- 539 Larsson, A. (2014). AliView: a fast and lightweight alignment viewer and editor for large datasets.  
540 *Bioinformatics* 30, 3276–3278.
- 541 Li, H. (2013). Aligning sequence reads, clone sequences and assembly contigs with BWA-MEM.  
542 ArXiv13033997 Q-Bio.
- 543 Li, H., Handsaker, B., Wysoker, A., Fennell, T., Ruan, J., Homer, N., Marth, G., Abecasis, G., and  
544 Durbin, R. (2009). The Sequence Alignment/Map format and SAMtools. *Bioinformatics* 25, 2078–  
545 2079.
- 546 Li, Z., Chen, H., Jiao, P., Deng, G., Tian, G., Li, Y., Hoffmann, E., Webster, R.G., Matsuoka, Y., and  
547 Yu, K. (2005). Molecular basis of replication of duck H5N1 influenza viruses in a mammalian mouse  
548 model. *J. Virol.* 79, 12058–12064.
- 549 Liu, S., Li, R., Zhang, R., Chan, C.C.S., Xi, B., Zhu, Z., Yang, J., Poon, V.K.M., Zhou, J., Chen, M., et  
550 al. (2011). CL-385319 inhibits H5N1 avian influenza A virus infection by blocking viral entry. *Eur. J.*  
551 *Pharmacol.* 660, 460–467.
- 552 Liu, S., Zhu, W., Feng, Z., Gao, R., Guo, J., Li, X., Liu, J., Wang, D., and Shu, Y. (2018). Substitution  
553 of D701N in the PB2 protein could enhance the viral replication and pathogenicity of Eurasian avian-  
554 like H1N1 swine influenza viruses. *Emerg. Microbes Infect.* 7.
- 555 Lu, L., Lycett, S.J., and Leigh Brown, A.J. (2014). Reassortment patterns of avian influenza virus  
556 internal segments among different subtypes. *BMC Evol. Biol.* 14, 16.
- 557 Mänz, B., Schwemmler, M., and Brunotte, L. (2013). Adaptation of Avian Influenza A Virus Polymerase  
558 in Mammals To Overcome the Host Species Barrier. *J. Virol.* 87, 7200–7209.
- 559 Matrosovich, M., Tuzikov, A., Bovin, N., Gambaryan, A., Klimov, A., Castrucci, M.R., Donatelli, I., and  
560 Kawaoka, Y. (2000). Early Alterations of the Receptor-Binding Properties of H1, H2, and H3 Avian  
561 Influenza Virus Hemagglutinins after Their Introduction into Mammals. *J. Virol.* 74, 8502–8512.
- 562 Minin, V.N., Bloomquist, E.W., and Suchard, M.A. (2008). Smooth Skyride through a Rough Skyline:  
563 Bayesian Coalescent-Based Inference of Population Dynamics. *Mol. Biol. Evol.* 25, 1459–1471.
- 564 Miotto, O., Heiny, A., Tan, T.W., August, J.T., and Brusica, V. (2008). Identification of human-to-  
565 human transmissibility factors in PB2 proteins of influenza A by large-scale mutual information  
566 analysis. *BMC Bioinformatics* 9, S18.
- 567 Miotto, O., Heiny, A.T., Albrecht, R., García-Sastre, A., Tan, T.W., August, J.T., and Brusica, V. (2010).  
568 Complete-Proteome Mapping of Human Influenza A Adaptive Mutations: Implications for Human  
569 Transmissibility of Zoonotic Strains. *PLOS ONE* 5, e9025.
- 570 Morens, D.M., and Taubenberger, J.K. (2010). Historical thoughts on influenza viral ecosystems, or  
571 behold a pale horse, dead dogs, failing fowl, and sick swine. *Influenza Other Respir. Viruses* 4, 327–  
572 337.
- 573 Murphy, B.R., Harper, J., Sly, D.L., London, W.T., Miller, N.T., and Webster, R.G. (1983). Evaluation  
574 of the A/Seal/Mass/1/80 virus in squirrel monkeys. *Infect. Immun.* 42, 424–426.
- 575 Nagy, A., Vostinakova, V., Pirchanova, Z., Cernikova, L., Dirbakova, Z., Mojzsis, M., Jirincova, H.,  
576 Havlickova, M., Dan, A., Ursu, K., et al. (2010). Development and evaluation of a one-step real-time  
577 RT-PCR assay for universal detection of influenza A viruses from avian and mammal species. *Arch.*  
578 *Virol.* 155, 665–673.

- 579 Nguyen, L.-T., Schmidt, H.A., von Haeseler, A., and Minh, B.Q. (2015). IQ-TREE: A Fast and Effective  
580 Stochastic Algorithm for Estimating Maximum-Likelihood Phylogenies. *Mol. Biol. Evol.* 32, 268–274.
- 581 Ohishi, K., Kishida, N., Ninomiya, A., Kida, H., Takada, Y., Miyazaki, N., Boltunov, A.N., and  
582 Maruyama, T. (2004). Antibodies to human-related H3 influenza A virus in Baikal seals (*Phoca*  
583 *sibirica*) and ringed seals (*Phoca hispida*) in Russia. *Microbiol. Immunol.* 48, 905–909.
- 584 OIE (2015). Chapter 2.3.4. Avian influenza. In *Manual of Diagnostic Tests and Vaccines for Terrestrial*  
585 *Animals.*, p.
- 586 Payungporn, S., Chutinimitkul, S., Chaisingh, A., Damrongwantanapokin, S., Buranathai, C.,  
587 Amonsin, A., Theamboonlers, A., and Poovorawan, Y. (2006). Single step multiplex real-time RT-PCR  
588 for H5N1 influenza A virus detection. *J. Virol. Methods* 131, 143–147.
- 589 Poole, E., Elton, D., Medcalf, L., and Digard, P. (2004). Functional domains of the influenza A virus  
590 PB2 protein: identification of NP- and PB1-binding sites. *Virology* 321, 120–133.
- 591 Price, M.N., Dehal, P.S., and Arkin, A.P. (2009). FastTree: Computing Large Minimum Evolution  
592 Trees with Profiles instead of a Distance Matrix. *Mol. Biol. Evol.* 26, 1641–1650.
- 593 Puryear, W.B., Keogh, M., Hill, N., Moxley, J., Josephson, E., Davis, K.R., Bando, C., Lidgard, D.,  
594 Bogomolni, A., Levin, M., et al. (2016). Prevalence of influenza A virus in live-captured North Atlantic  
595 gray seals: a possible wild reservoir. *Emerg. Microbes Infect.* 5, 1–9.
- 596 Rambaut, A., Lam, T.T., Max Carvalho, L., and Pybus, O.G. (2016). Exploring the temporal structure  
597 of heterochronous sequences using TempEst (formerly Path-O-Gen). *Virus Evol.* 2.
- 598 Rambaut, A., Drummond, A.J., Xie, D., Baele, G., and Suchard, M.A. (2018). Posterior Summarization  
599 in Bayesian Phylogenetics Using Tracer 1.7. *Syst. Biol.* 67, 901–904.
- 600 Ramis, A.J., van Riel, D., van de Bildt, M.W.G., Osterhaus, A., and Kuiken, T. (2012). Influenza A and  
601 B virus attachment to respiratory tract in marine mammals. *Emerg. Infect. Dis.* 18, 817–820.
- 602 Reperant, L.A., Rimmelzwaan, G.F., and Kuiken, T. (2009). Avian influenza viruses in mammals. *Rev.*  
603 *Sci. Tech. Int. Off. Epizoot.* 28, 137–159.
- 604 Shu, Y., and McCauley, J. (2017). GISAID: Global initiative on sharing all influenza data – from vision  
605 to reality. *Eurosurveillance* 22, 30494.
- 606 Slomka, M.J., Pavlidis, T., Banks, J., Shell, W., McNally, A., Essen, S., and Brown, I.H. (2007).  
607 Validated H5 Eurasian Real-Time Reverse Transcriptase–Polymerase Chain Reaction and Its  
608 Application in H5N1 Outbreaks in 2005–2006. *Avian Dis.* 51, 373–377.
- 609 Slomka, M.J., Pavlidis, T., Coward, V.J., Voermans, J., Koch, G., Hanna, A., Banks, J., and Brown,  
610 I.H. (2009). Validated RealTime reverse transcriptase PCR methods for the diagnosis and  
611 pathotyping of Eurasian H7 avian influenza viruses. *Influenza Other Respir. Viruses* 3, 151–164.
- 612 Slomka, M.J., Irvine, R.M., Pavlidis, T., Banks, J., and Brown, I.H. (2010). Role of real-time RT-PCR  
613 platform technology in the diagnosis and management of notifiable avian influenza outbreaks:  
614 experiences in Great Britain. *Avian Dis.* 54, 591–596.
- 615 Solórzano, A., Foni, E., Córdoba, L., Baratelli, M., Razzuoli, E., Bilato, D., Burgo, M.Á.M. del, Perlin,  
616 D.S., Martínez, J., Martínez-Orellana, P., et al. (2015). Cross-Species Infectivity of H3N8 Influenza  
617 Virus in an Experimental Infection in Swine. *J. Virol.* 89, 11190–11202.
- 618 Stalknecht, D.E., Kearney, M.T., Shane, S.M., and Zwank, P.J. (1990). Effects of pH, Temperature,  
619 and Salinity on Persistence of Avian Influenza Viruses in Water. *Avian Dis.* 34, 412–418.

- 620 Steel, J., Lowen, A.C., Mubareka, S., and Palese, P. (2009). Transmission of Influenza Virus in a  
621 Mammalian Host Is Increased by PB2 Amino Acids 627K or 627E/701N. *PLOS Pathog.* 5, e1000252.
- 622 Suchard, M.A., Lemey, P., Baele, G., Ayres, D.L., Drummond, A.J., and Rambaut, A. (2018).  
623 Bayesian phylogenetic and phylodynamic data integration using BEAST 1.10. *Virus Evol.* 4.
- 624 Tamuri, A.U., Reis, M. dos, Hay, A.J., and Goldstein, R.A. (2009). Identifying Changes in Selective  
625 Constraints: Host Shifts in Influenza. *PLOS Comput. Biol.* 5, e1000564.
- 626 Taubenberger, J.K., and Morens, D.M. (2010). Influenza: The Once and Future Pandemic. *Public*  
627 *Health Rep.* 125, 16–26.
- 628 Van Bonn, W.G. (2015). Chapter 44 - Pinnipedia. In *Fowler's Zoo and Wild Animal Medicine, Volume*  
629 *8*, R.E. Miller, and M.E. Fowler, eds. (St. Louis: W.B. Saunders), pp. 436–450.
- 630 Venkatesh, D., Poen, M.J., Bestebroer, T.M., Scheuer, R.D., Vuong, O., Chkhaidze, M.,  
631 Machabishvili, A., Mamuchadze, J., Ninua, L., Fedorova, N.B., et al. (2018). Avian Influenza Viruses  
632 in Wild Birds: Virus Evolution in a Multihost Ecosystem. *J. Virol.* 92, e00433-18.
- 633 Webster, R.G., Yakhno, M., Hinshaw, V.S., Bean, W.J., and Copal Murti, K. (1978). Intestinal  
634 influenza: Replication and characterization of influenza viruses in ducks. *Virology* 84, 268–278.
- 635 Webster, R.G., Geraci, J., Petursson, G., and Skirnisson, K. (1981). Conjunctivitis in human beings  
636 caused by influenza A virus of seals. *N. Engl. J. Med.* 304.
- 637 Webster, R.G., Bean, W.J., Gorman, O.T., Chambers, T.M., and Kawaoka, Y. (1992). Evolution and  
638 ecology of influenza A viruses. *Microbiol. Mol. Biol. Rev.* 56, 152–179.
- 639 White, V.C. (2013). A review of influenza viruses in seals and the implications for public health. *US*  
640 *Army Med. Dep. J.* 45–50.
- 641 Wilson, H.M., Hall, J.S., Flint, P.L., Franson, J.C., Ely, C.R., Schmutz, J.A., and Samuel, M.D. (2013).  
642 High Seroprevalence of Antibodies to Avian Influenza Viruses among Wild Waterfowl in Alaska:  
643 Implications for Surveillance. *PLOS ONE* 8, e58308.
- 644 Yang, H., Nguyen, H.T., Carney, P.J., Guo, Z., Chang, J.C., Jones, J., Davis, C.T., Villanueva, J.M.,  
645 Gubareva, L.V., and Stevens, J. (2015). Structural and Functional Analysis of Surface Proteins from  
646 an A(H3N8) Influenza Virus Isolated from New England Harbor Seals. *J. Virol.* 89, 2801–2812.
- 647 Yu, G., Smith, D.K., Zhu, H., Guan, Y., and Lam, T.T.-Y. (2017). ggtree: an r package for visualization  
648 and annotation of phylogenetic trees with their covariates and other associated data. *Methods Ecol.*  
649 *Evol.* 8, 28–36.
- 650 Zerbino, D.R., and Birney, E. (2008). Velvet: Algorithms for de novo short read assembly using de  
651 Bruijn graphs. *Genome Res.* 18, 821–829.
- 652 Zohari, S., Neimanis, A., Härkönen, T., Moraeus, C., and Valarcher, J.F. (2014). Avian influenza  
653 A(H10N7) virus involvement in mass mortality of harbour seals (*Phoca vitulina*) in Sweden, March  
654 through October 2014. *Eurosurveillance* 19, 20967.
- 655



**Figure 1 (A-B)**

Grey seal pup. (A) Focally extensive, chronic-active, purulent and fibrino-necrotising cellulitis in subcutaneous tissues and skeletal muscle over the thorax. (B) Immunohistochemical demonstration of Influenza A nucleoprotein antigen in the nuclei of epithelial cells within the nasal mucosa of a grey seal. (DAB chromogen and haematoxylin counterstain) (Objective: 40x).

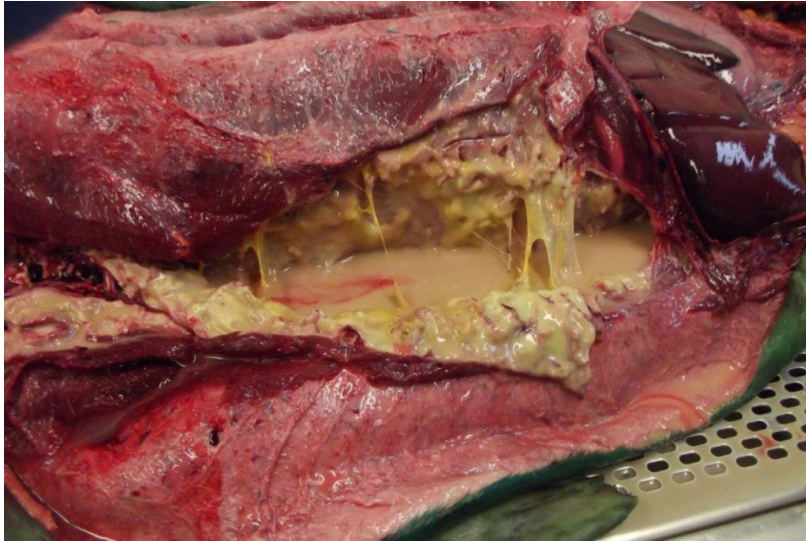

Figure 1A

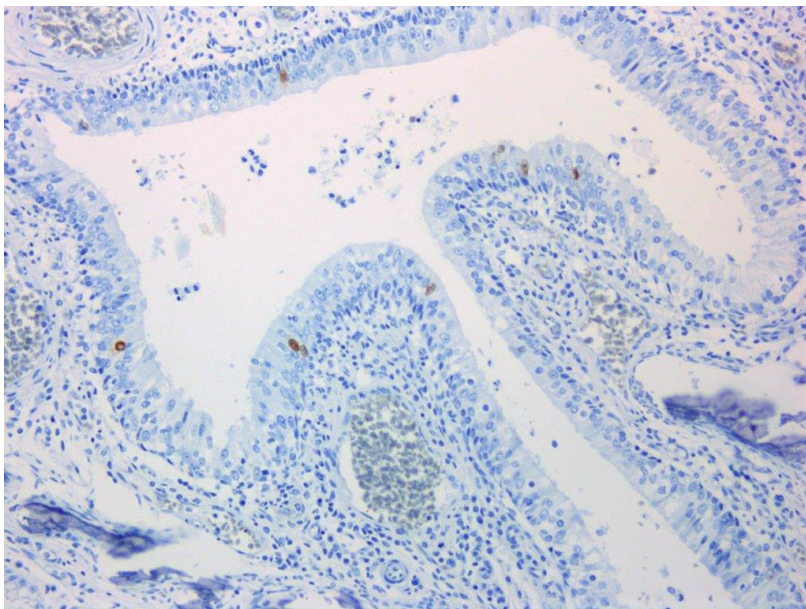

Figure 1B

## Figure 2 (A-G, H)

Maximum clade credibility summary trees for BEAST analysis of segment datasets: HA, NA, NP, NS, PA, PB1, PB2 (A-G respectively). Nodes connecting the seal virus tip with the closest related strain(s) are highlighted in grey. Black diamond (◆) shapes at nodes indicate posterior probability > 0.75. Nodes are labelled with node ages as inferred by BEAST. Figure 2H shows the maximum likelihood tree for the MP gene dataset. Support values (approximate likelihood ratio test) are labelled at nodes, and nodes connecting the seal virus tip with the closest related strain is highlighted in grey.

Figure 2A

seal – HA

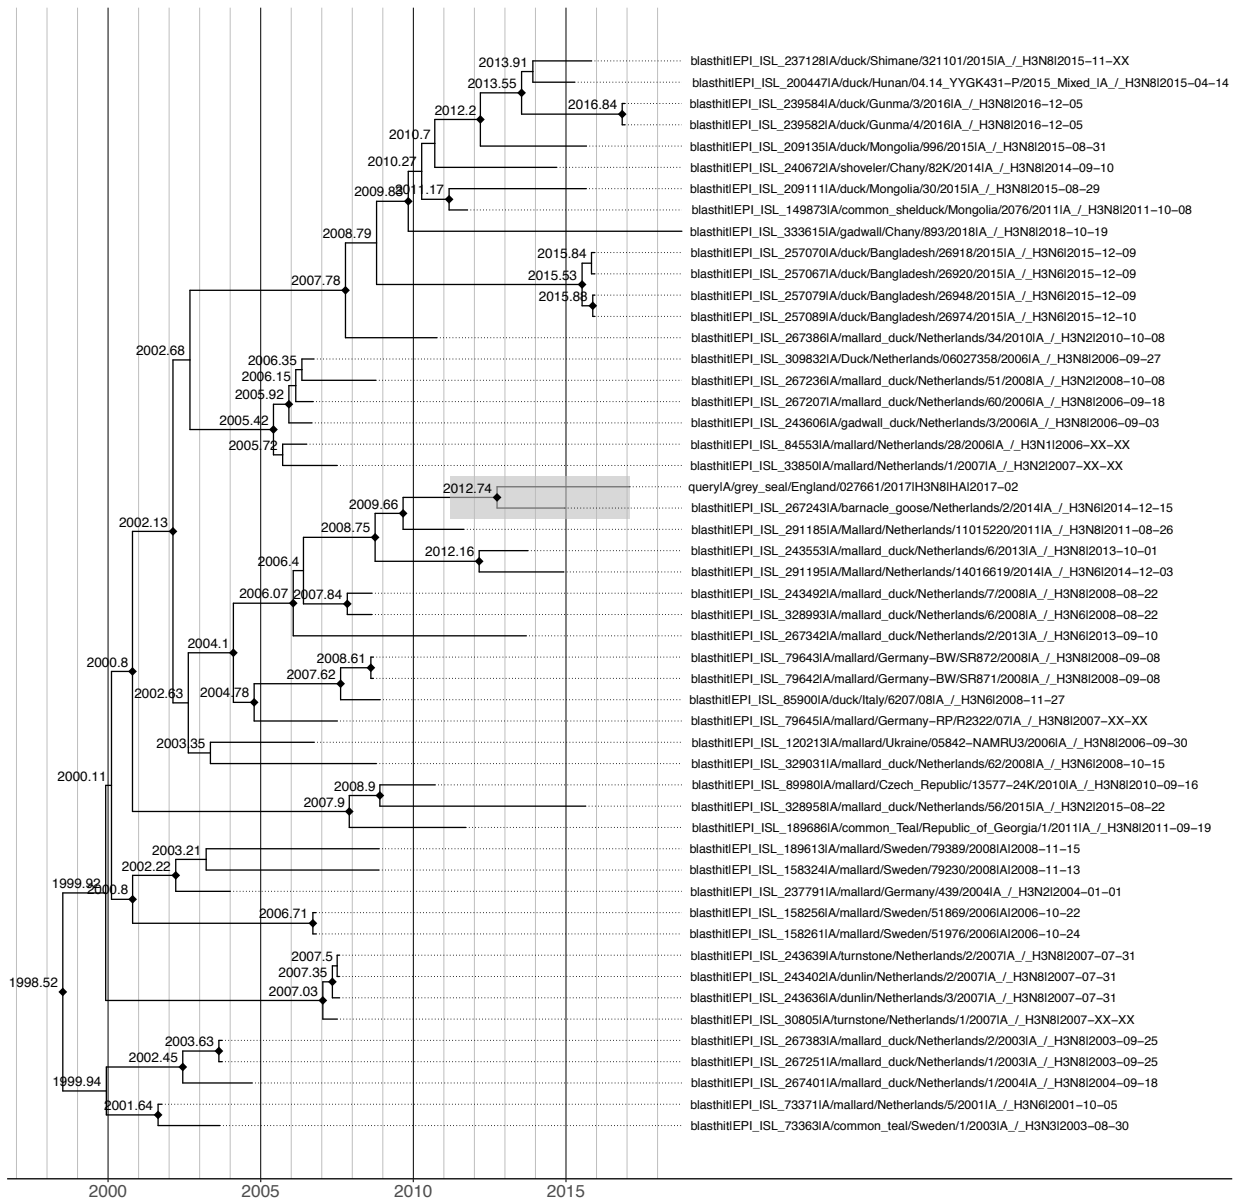

Figure 2B

seal – NA

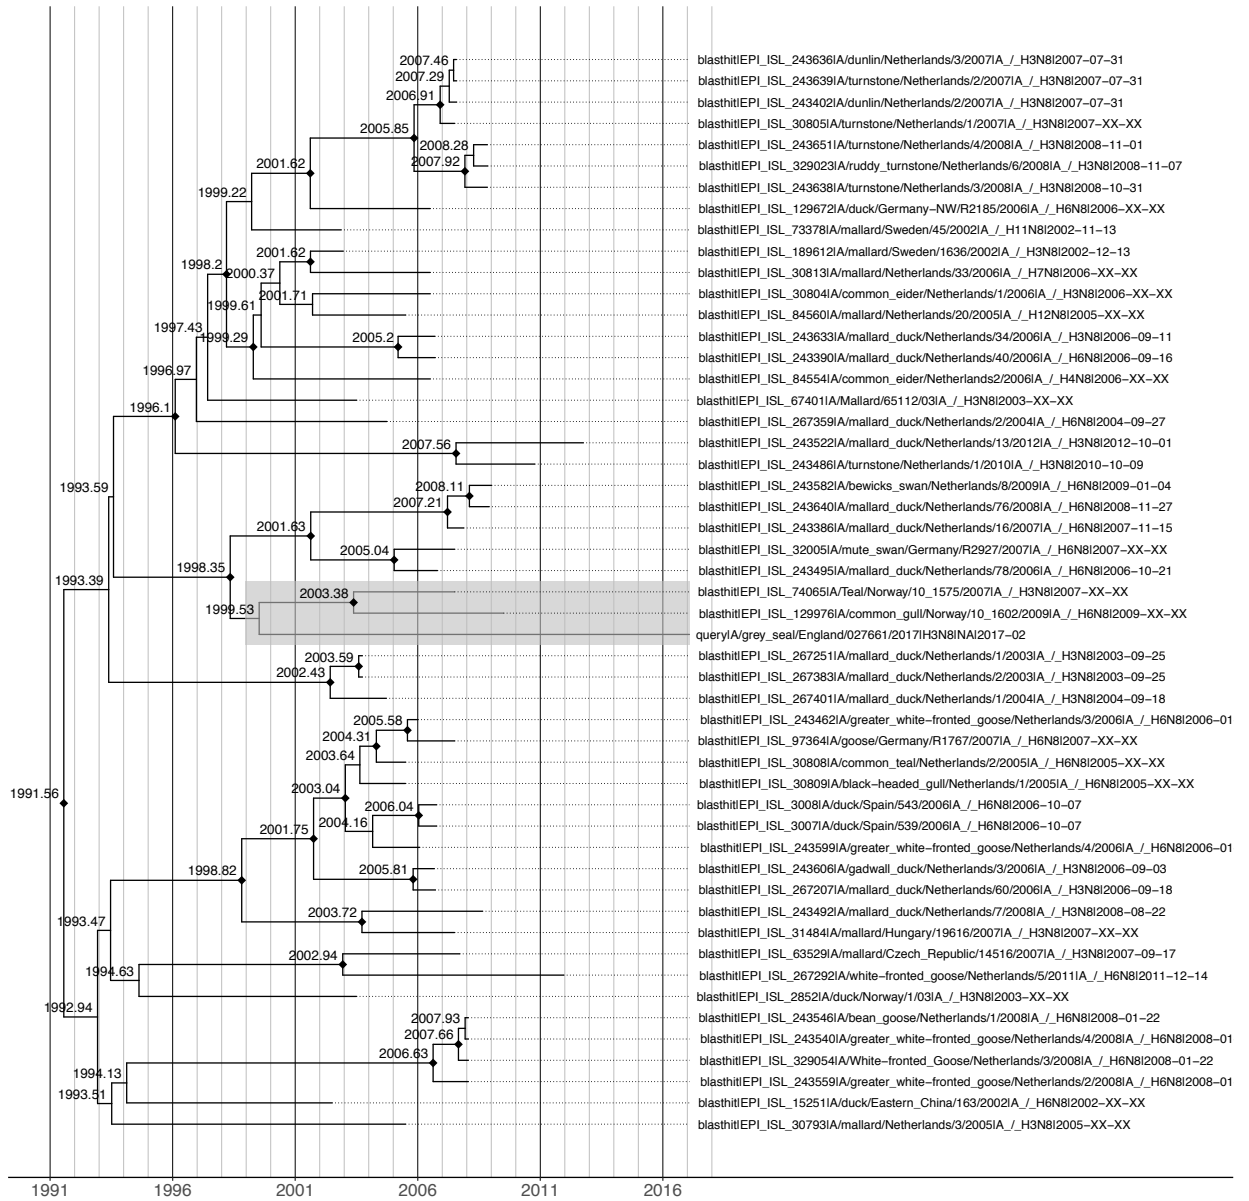





Figure 2D

seal – NS

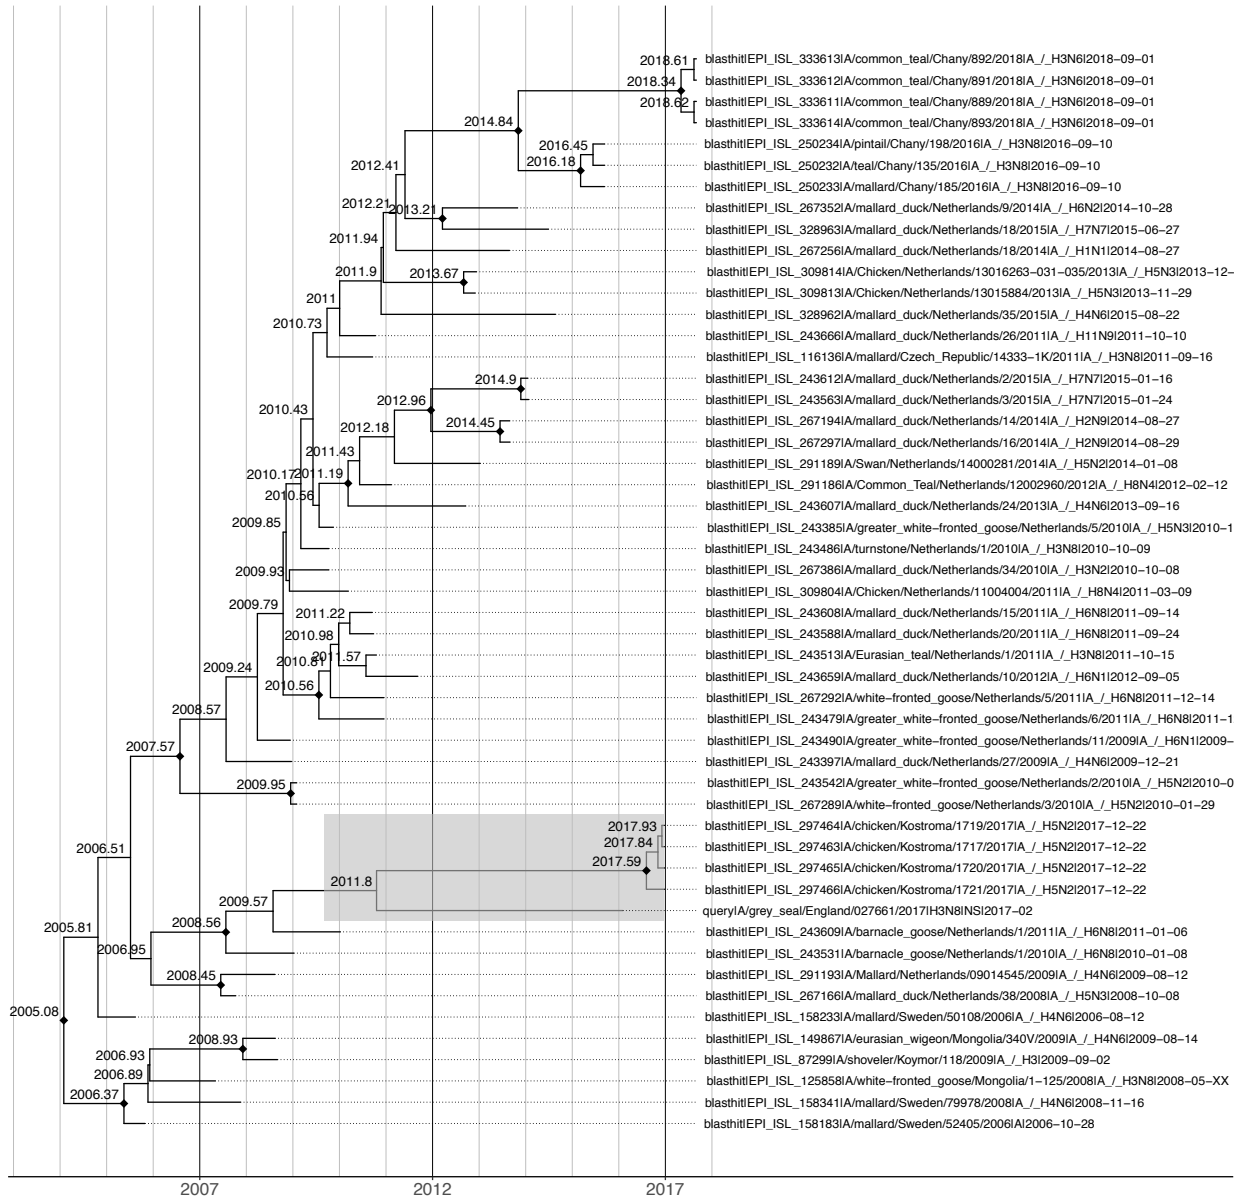

Figure 2E

seal – PA

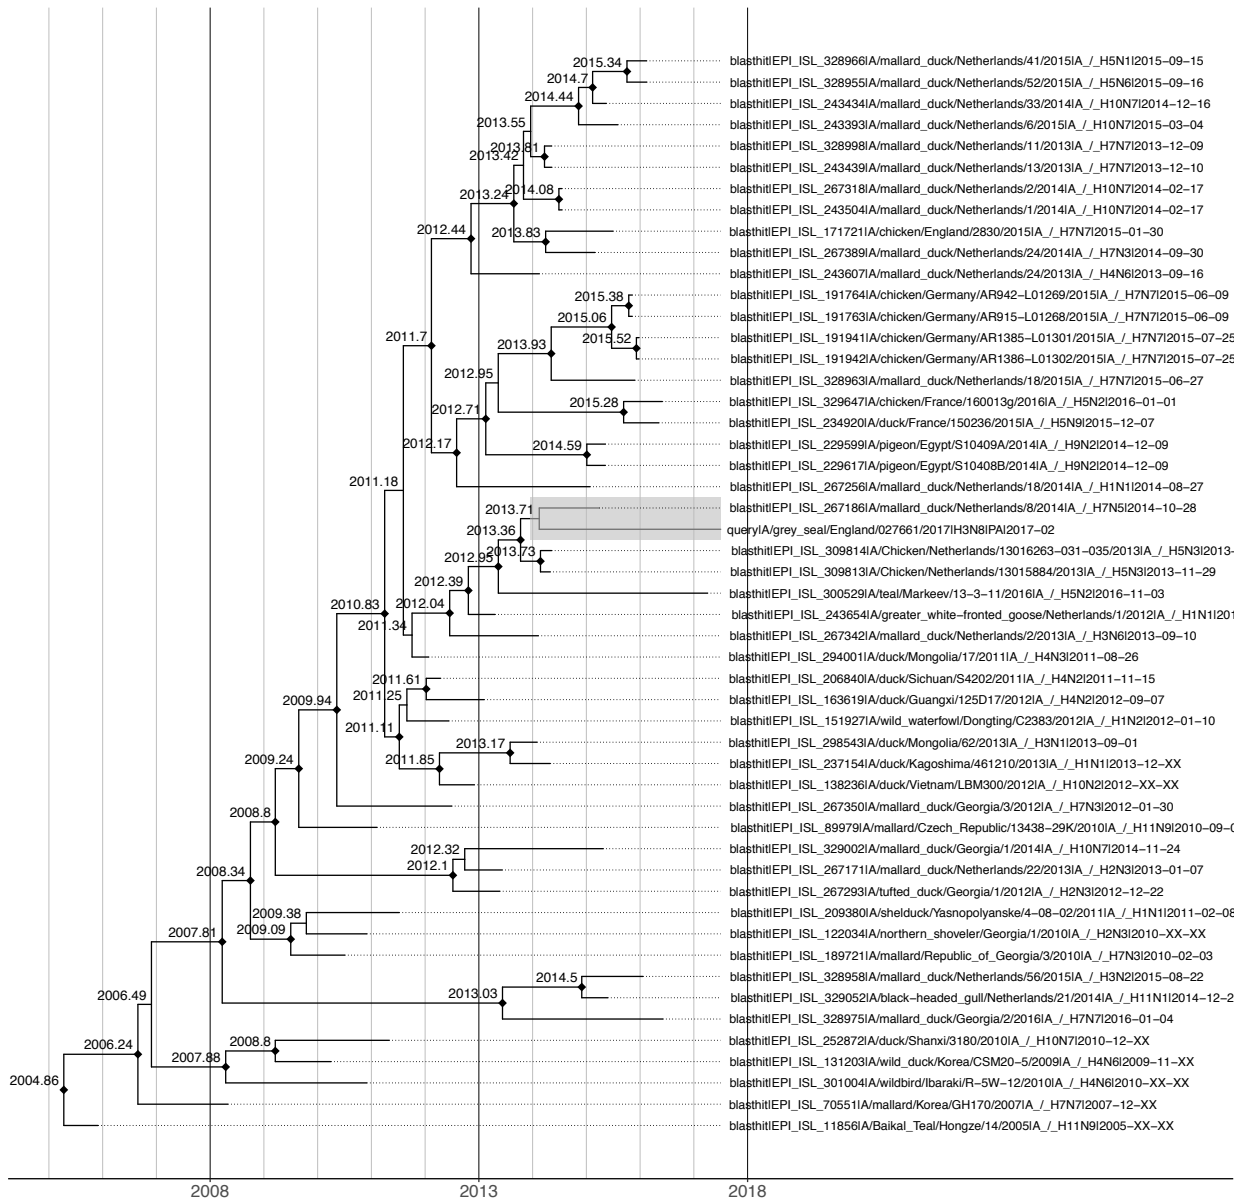

Figure 2F

seal – PB1

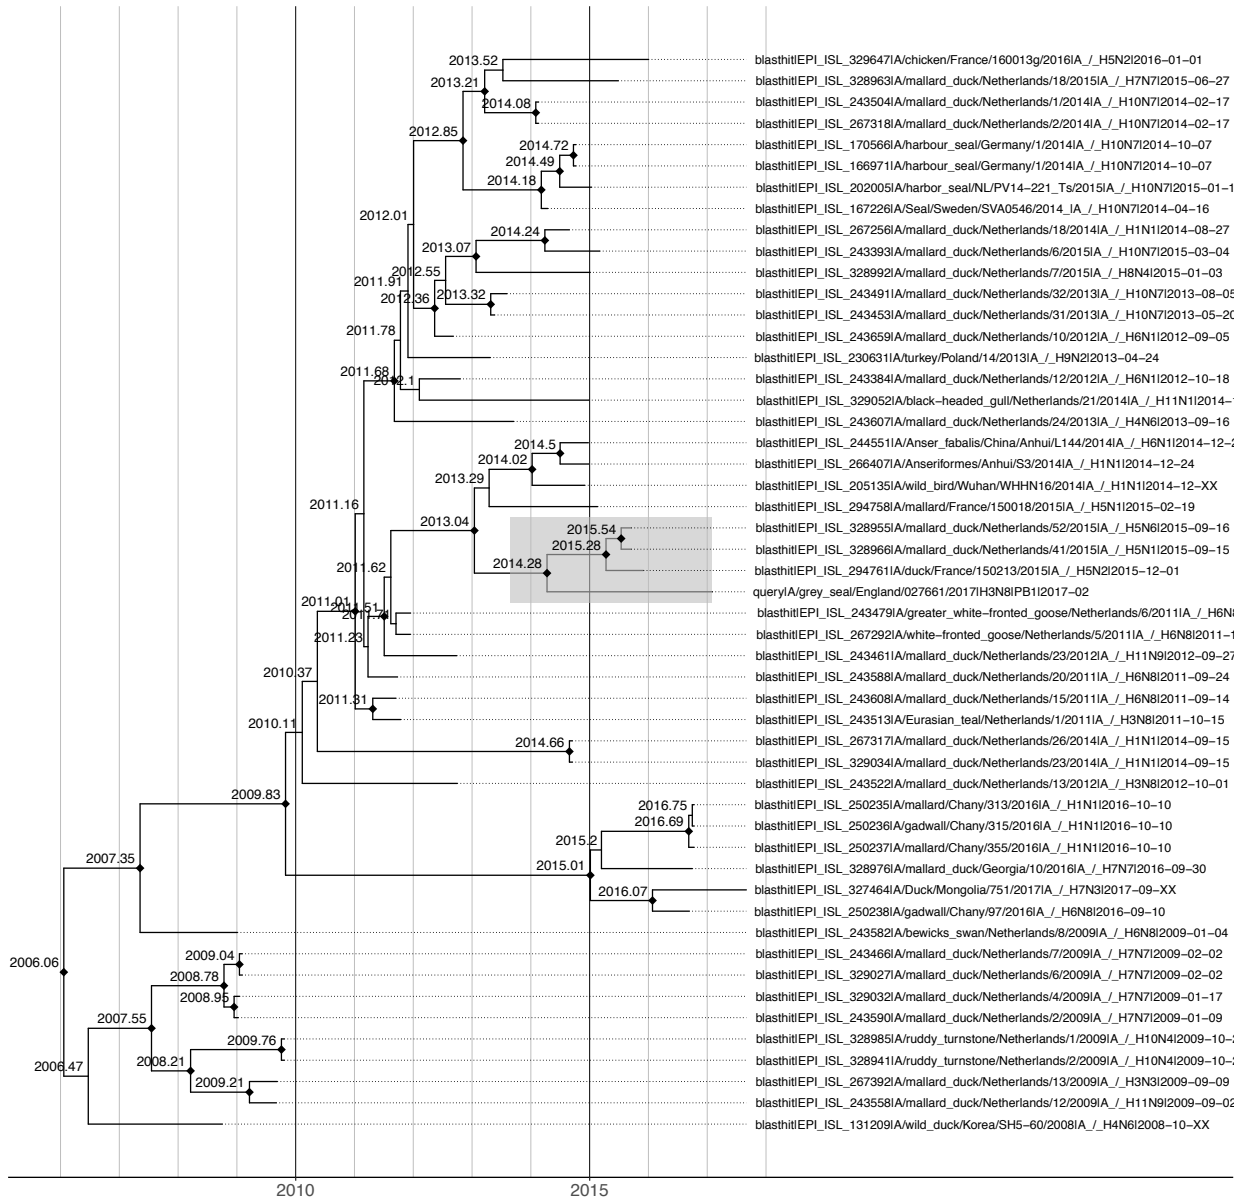

Figure 2G

seal – PB2

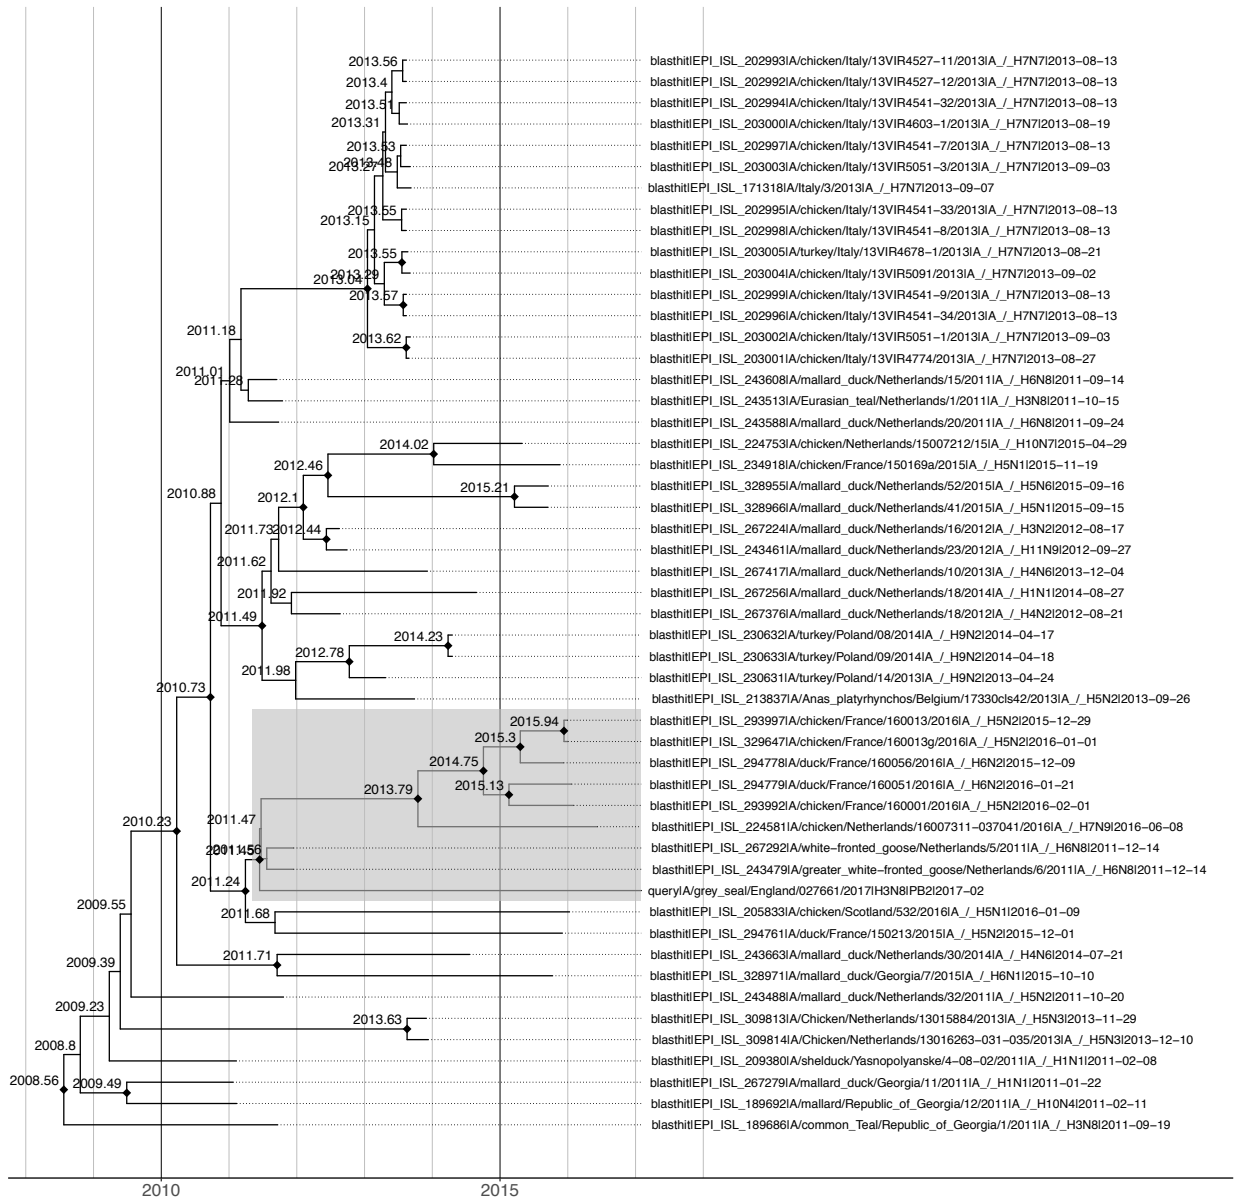

Figure 2H

seal - MP (ML tree)

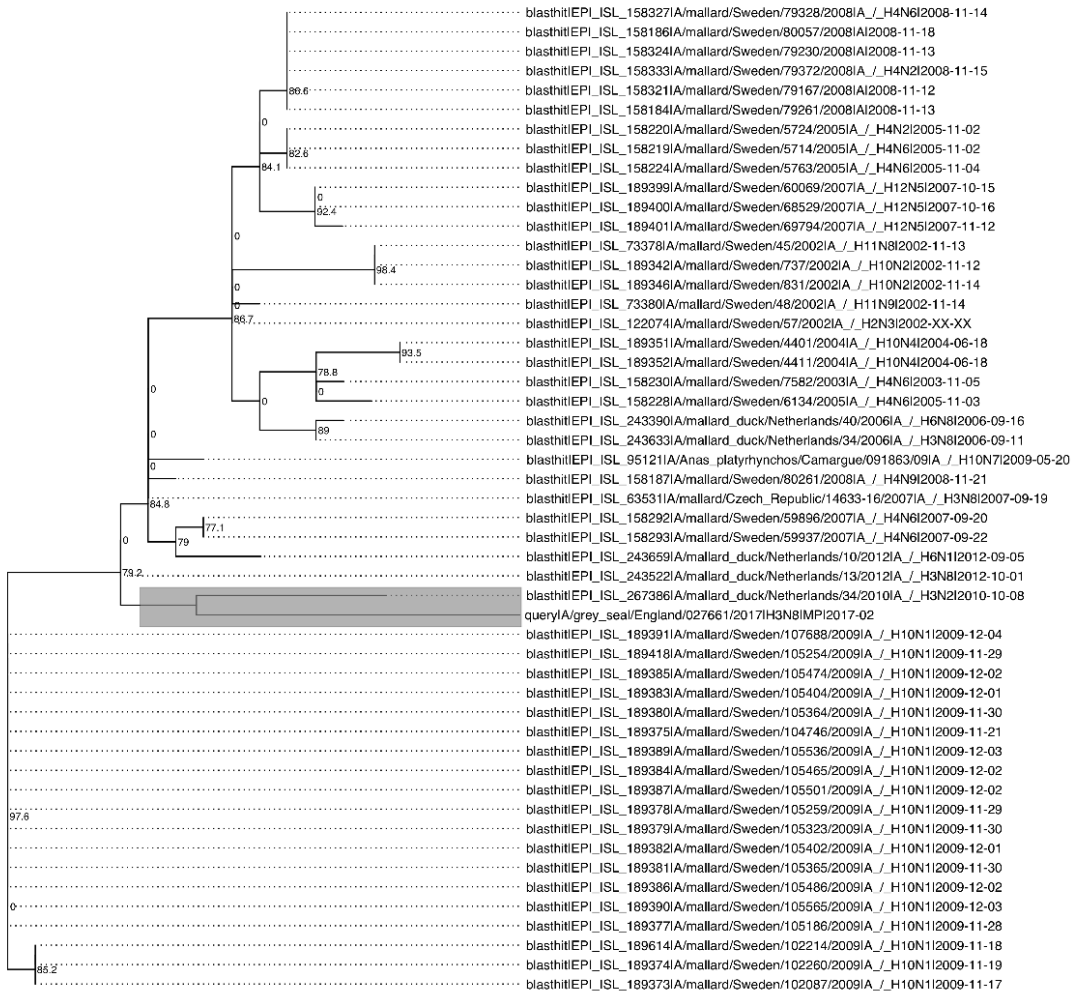

0.001

Figure 3

Putative divergence times (TMRCA – time to most recent common ancestor) of the seal sequence from the closest related wild bird sequence for each segment. Error bars indicate 95% highest posterior density.

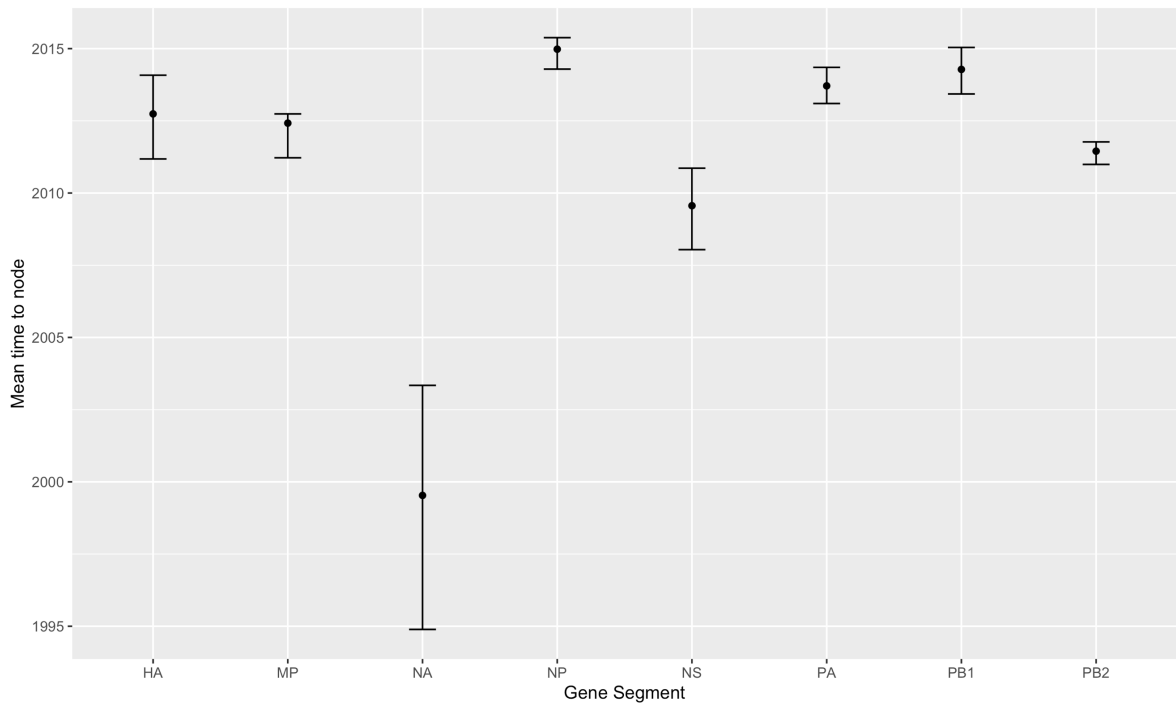

| Segment | TMRCA   | Lower 95% HPD | Upper 95% HPD | Posterior probability of node > 0.75 | Host               | Country                | Year           | Subtype             |
|---------|---------|---------------|---------------|--------------------------------------|--------------------|------------------------|----------------|---------------------|
| HA      | 2012.74 | 2011.18       | 2014.08       | y                                    | barnacle goose     | The Netherlands        | 2014           | H3N6                |
| MP      | n/a     | n/a           | n/a           | n/a                                  | mallard            | The Netherlands        | 2010           | H3N2                |
| NA      | 1999.53 | 1994.89       | 2003.34       | n                                    | teal/gull          | Norway                 | 2007/2009      | H3N8/H6N8           |
| NP      | 2014.98 | 2014.29       | 2015.38       | n                                    | mallard            | The Netherlands        | 2015           | unknown             |
| NS      | 2009.56 | 2008.04       | 2010.86       | n                                    | barnacle goose     | The Netherlands        | 2011           | H6N8                |
| PA      | 2013.71 | 2013.1        | 2014.35       | n                                    | mallard            | The Netherlands        | 2014           | H7N5                |
| PB1     | 2014.28 | 2013.43       | 2015.04       | y                                    | duck               | The Netherlands/France | 2015           | H5N1/H5N2/H5N6      |
| PB2     | 2011.45 | 2010.99       | 2011.77       | y                                    | goose/chicken/duck | The Netherlands/France | 2011/2015/2016 | H5N2/H6N2/H7N9/H6N8 |

**Table 1.** Putative divergence times (TMRCA – time to most recent common ancestor) and 95% highest posterior density (HPD) of the A/Grey seal/England/027661/2017 sequence from the closest related wild bird sequence for each segment, and the posterior probability of the node are shown, along with information about the closest related wild bird sequence including the host, country and year of isolation and subtype of virus. For the MP gene, the closest related sequence according to the maximum-likelihood tree is shown.



| Segment | Amino acid substitutions in seal virus                                                                                                                               | References                                                                                           |
|---------|----------------------------------------------------------------------------------------------------------------------------------------------------------------------|------------------------------------------------------------------------------------------------------|
| HA      | Y9C [signal peptide]<br>T64A [48]<br>I81V [65]<br>S111G [95]<br>possible A154T (but might be same RCT --> ACT (T), or GCT (A)) [138]<br>A/T176S [160]<br>S235Y [219] |                                                                                                      |
| MP      | none                                                                                                                                                                 |                                                                                                      |
| NA      | N/S41D<br>T383A                                                                                                                                                      |                                                                                                      |
| NP      | V104M                                                                                                                                                                |                                                                                                      |
| NS      | none                                                                                                                                                                 |                                                                                                      |
| PA      | V91I<br>D/G101N<br><b>N/S321I</b>                                                                                                                                    | (Miotto et al., 2010)                                                                                |
| PB1     | <b>I517V</b><br><b>S678N</b>                                                                                                                                         | (Tamuri et al., 2009)<br>(Gabriel et al., 2005)                                                      |
| PB2     | <b>T/A105K</b><br>D161N<br>A/S395T<br>V667I<br>R/T676I<br><b>D701N</b><br>possible R753T (but might be same ASA --> AGA (R) or ACA (T))                              | (Tamuri et al., 2009; Miotto et al., 2008)<br><br><br><br><br>(Liu et al., 2018; Steel et al., 2009) |

**Table 2.** Segment-wise list of substitutions found in the seal virus inferred from inspection of alignments. Only residue changes that occur in the seal virus but not in the wild bird viruses are shown. Numbers in square brackets for HA indicate the reference H3-numbering of residues in A/Aichi/2/1968 (Burke and Smith 2014) inferred using the tool at FluDB website:

<https://tinyurl.com/HAnumbering>. For substitutions which have been previously described in a published study, the references are shown in the third column.
